# Supplementary material
Source: PubMed Central journal article supplement (PMC4134925)

# Synthetic and Mechanistic Aspects of the Regioselective Base-Mediated Reaction of Perfluoroalkyl- and Perfluoroarylsilanes with Heterocyclic *N*-Oxides

David E. Stephens, Gabriel Chavez, Martin Valdes, Monica Dovalina, Hadi Arman, and Oleg V. Larionov\*

Department of Chemistry, University of Texas at San Antonio, One UTSA Circle, San Antonio, Texas 78249, United States

## General Procedures

**Materials and methods:** Tetrahydrofuran was distilled from sodium benzophenone ketyl. Isoquinoline-*N*-oxide was purchased from Alfa Aesar, 4-phenylpyridine *N*-oxide, (pentafluorophenyl)trimethylsilane, and (pentafluoroethyl)trimethylsilane were purchased from TCI. (Trifluoromethyl)trimethylsilane was purchased from Matrix Scientific, and (difluoromethyl)trimethylsilane was purchased from Oakwood Chemicals. All other chemicals were used as commercially available (Sigma-Aldrich, Acros, Alfa Aesar, Combi-Blocks, Strem). All reactions were conducted with continuous magnetic stirring under an atmosphere of argon in oven-dried glassware. Low-temperature experiments were conducted using a Neslab Cryotrol CB-80 cryostat. Reactions were monitored by TLC until deemed complete using silica gel-coated glass plates (Merck Kieselgel 60 F254). Plates were visualized under ultraviolet light (254 nm).

**Purification:** Column chromatography was performed using CombiFlash Rf-200 (Teledyne-Isco) automated flash chromatography system with self-packed RediSep columns.

**Characterization:**  $^1\text{H}$ ,  $^{13}\text{C}$ ,  $^{19}\text{F}$  NMR spectra were recorded at 500 and 300 MHz ( $^1\text{H}$ ), 125 and 75 MHz ( $^{13}\text{C}$ ), and 282 MHz ( $^{19}\text{F}$ ) on Varian Mercury VX 300 and Agilent Inova 500 instruments in  $\text{CDCl}_3$  solutions. Chemical shifts ( $\delta$ ) are reported in parts per million (ppm) from the residual solvent peak and coupling constants ( $J$ ) in Hz. Proton

multiplicity is assigned using the following abbreviations: singlet (s), doublet (d), triplet (t), quartet (quart.), quintet (quint.), septet (sept.), multiplet (m), broad (br).

Infrared measurements were carried out neat on a Bruker Vector 22 FT-IR spectrometer fitted with a Specac diamond attenuated total reflectance (ATR) module.

### 5-Bromoquinoline 1-oxide<sup>1</sup> (**S1**)

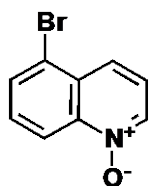

To a stirred solution of 5-bromoquinoline (400 mg, 1.94 mmol) in chloroform (10 mL) was added *meta*-chloroperoxybenzoic acid (620 mg, 2.52 mmol, 1.3 equiv., 70 % in H<sub>2</sub>O). After 12 h the reaction was diluted with a saturated aqueous solution of sodium thiosulfate/sodium carbonate (20 mL, 1:1). After separating the layers the aqueous layer was extracted with dichloromethane (3 x 10 mL), the organic layers combined, dried over anhydrous sodium sulfate, and concentrated under reduced pressure to yield **S1** (332 mg, 77 %) as tan solid. – m.p.: 65–67 °C. – <sup>1</sup>H NMR (500 MHz): 7.41 (1 H, dd, *J* = 6, 8 Hz), 7.61 (1 H, dd, *J* = 7.5, 8.5 Hz), 7.94 (1 H, dd, *J* = 1, 7.5 Hz), 8.12 (1 H, d, *J* = 8.5 Hz), 8.56 (1 H, dd, *J* = 0.5, 6 Hz), 8.77 (1 H, d, *J* = 8.5 Hz) ppm. – <sup>13</sup>C NMR (125 MHz): 119.5, 121.8, 122.3, 125.9, 129.7, 130.5, 132.7, 136.2, 142.1 ppm. – IR: 1056, 1142, 1195, 1255, 1289, 1394, 1443, 1505, 1663, 2999, 3067, 3107 cm<sup>-1</sup>.

### 4-(*tert*-Butylthio)-7-chloroquinoline 1-oxide (**S2**)

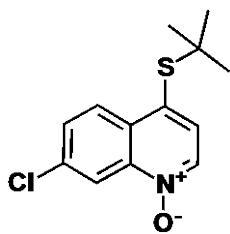

To a stirred solution of **S3** (200 mg, 0.930 mmol) in ethanol (5 mL) was added sodium 2-methyl-2-propanethiolate (136 mg, 1.21 mmol, 1.3 equiv.) and the reaction heated to 50 °C for 12 h. The reaction was concentrated on Celite and purified by column chromatography [hexanes/EtOAc/Si<sub>2</sub>O] to yield **S2** (151 mg, 61 %) as colorless solid. – m.p.: 125 – 127

°C. –  $^1\text{H}$  NMR (500 MHz): 1.32 (9 H, s), 7.52 (1 H, d,  $J = 7$  Hz), 7.62 (1 H, dd,  $J = 2.5$ , 10 Hz), 8.46 (1 H, d,  $J = 6.5$  Hz), 8.55 (1 H, d,  $J = 10$  Hz), 8.75 (1 H, d,  $J = 2.5$  Hz) ppm.  
–  $^{13}\text{C}$  NMR (125 MHz): 31.2, 49.4, 119.4, 128.2, 129.5, 129.9, 130.4, 130.6, 132.0, 135.2, 137.2, 142.1 ppm. – IR: 1134, 1183, 1242, 1345, 1459, 2900, 2971, 3097  $\text{cm}^{-1}$ . – MS (ESI): 267.9, HRMS: 268.0140, calcd: 268.0557 [ $\text{M}+\text{H}^+$ ].

### 4,7-Dichloroquinoline 1-oxide<sup>2</sup> (S3)

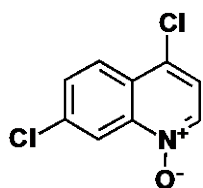

**S3** was prepared according to literature procedure. – m.p.: 164–165 °C<sup>3</sup>  
–  $^1\text{H}$  NMR (500 MHz): 7.36 (1 H, d,  $J = 6.5$  Hz), 7.68 (1 H, d,  $J = 9$  Hz), 8.13 (1 H, d,  $J = 9$  Hz), 8.43 (1 H, d,  $J = 6.5$  Hz), 8.77 (1 H, s) ppm.  
–  $^{13}\text{C}$  NMR (125 MHz): 119.93, 121.22, 121.42, 125.60, 126.52, 126.75, 128.68, 129.85, 130.80, 135.96, 138.22, 142.33, 150.88 ppm. – IR: 829, 1091, 1291, 1367, 1412, 1555, 1609, 3025, 3094  $\text{cm}^{-1}$ .

### 7-Chloro-4-(isopropylthio)quinoline 1-oxide (S4)

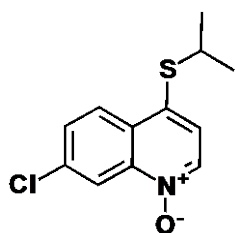

To a stirred solution of **S3** (200 mg, 0.930 mmol) in ethanol (5 mL) was added sodium 2-propanethiolate (118 mg, 1.21 mmol, 1.3 equiv.) and the reaction heated to 50 °C for 12 h. The reaction was concentrated on Celite and purified by column chromatography [hexanes/EtOAc/SiO<sub>2</sub>] to yield **S4** (168 mg, 71 %) as yellow solid. – m.p.: 50–53 °C.  
–  $^1\text{H}$  NMR (500 MHz): 1.41 (6 H, d,  $J = 6.5$  Hz), 3.57 (1 H, sept.,  $J = 6.5$  Hz), 7.27 (1 H, s), 7.63 (1 H, dd,  $J = 2$ , 9 Hz), 8.26 (1 H, d,  $J = 9$  Hz), 8.44 (1 H, d,  $J = 6.5$  Hz), 8.81 (1 H, d,  $J = 2$  Hz) ppm. –  $^{13}\text{C}$  NMR (125 MHz): 22.8, 38.0, 119.7, 121.0, 127.0, 128.2,

129.6, 134.8, 135.4, 137.3, 141.3 ppm. – IR: 1158, 1182, 1213, 1345, 1364, 1441, 1573, 2869, 2967, 3099  $\text{cm}^{-1}$ . – MS (ESI): 253.9, HRMS: 253.8814, calcd: 254.0401  $[\text{M}+\text{H}^+]$ .

### 8-Methoxyquinoline<sup>4</sup> (S5)

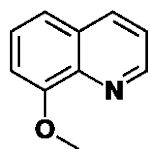

**S5** was prepared according to literature procedure.<sup>4</sup> – <sup>1</sup>H NMR (300 MHz): 4.06 (3 H, s), 7.05 (1 H, td,  $J = 1, 7.5$  Hz), 7.36–7.50 (3 H, m), 8.19 (1 H, td,  $J = 1, 7.5$  Hz), 8.96 (1 H, td,  $J = 1, 7.5$  Hz) ppm. – <sup>13</sup>C NMR (75 MHz):

56.03, 108.18, 119.52, 121.73, 127.25, 129.34, 137.24, 138.66, 148.45, 154.58 ppm. – IR: 1076, 1219, 1440, 1501, 1615, 2838, 2934, 3054  $\text{cm}^{-1}$ .

### 8-Methoxyquinoline 1-oxide<sup>2</sup> (S6)

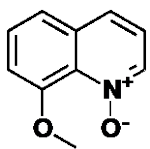

To a stirred solution of **S5** (340 mg, 2.12 mmol) in acetonitrile (1 mL) was added hydrogen peroxide (313  $\mu\text{L}$ , 3.18 mmol, 1.5 equiv., 30% in  $\text{H}_2\text{O}$ ) and phosphomolybdic acid (197  $\mu\text{L}$ , 0.21 mmol, 1 mol %, 20% in EtOH) followed by heating the reaction to 50  $^\circ\text{C}$ . After 12 h the reaction was diluted with a saturate aqueous solution of ammonium chloride (2 mL) and the aqueous layer extracted with dichloromethane (3 x 5 mL). The combined organic layers were dried over anhydrous sodium sulfate, concentrated under reduced pressure, and purified by column chromatography to yield **S6** (260 mg, 71%) as brown solid. – m.p.: 38–41  $^\circ\text{C}$  – <sup>1</sup>H NMR (300 MHz): 3.92 (3 H, s), 6.88 (1 H, dd,  $J = 1.5, 8$  Hz), 7.20–7.40 (3 H, m), 7.96 (1 H, dd,  $J = 1.5, 8$  Hz), 8.78 (1 H, dd,  $J = 1.5, 4$  Hz) ppm. – <sup>13</sup>C NMR (75 MHz): 55.84,

107.57, 119.42, 121.57, 126.72, 129.19, 136.07, 139.66, 148.89, 155.02 ppm. – IR: 910, 1090, 1232, 1378, 1467, 1504, 2858, 2954, 3037  $\text{cm}^{-1}$ .

### 7-Chloro-4-phenylquinolinene<sup>5</sup> (S7)

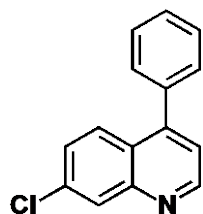

**S7** was prepared according to a literature procedure.<sup>5</sup> – <sup>1</sup>H NMR (500 MHz): 7.30 (1 H, d,  $J = 4$  Hz), 7.41 – 7.53 (6 H, m), 7.84 (1 H, d,  $J = 9$  Hz), 8.19 (1 H, d,  $J = 1$  Hz), 8.93 (1 H, d,  $J = 4$  Hz) ppm. – <sup>13</sup>C NMR (125 MHz): 121.4, 125.0, 127.3, 127.4, 128.3, 128.7, 128.8, 129.4, 135.1, 137.4, 148.3, 149.1, 150.9 ppm. – IR: 1071, 1167, 1271, 1304, 1374, 1417, 1488, 1573, 2834, 2877, 3031  $\text{cm}^{-1}$ .

### 5,7-Dichloro-8-methoxyquinoline<sup>6</sup> (S8)

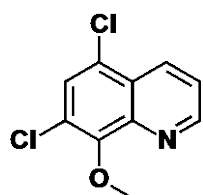

**S8** was prepared according to a literature procedure.<sup>7</sup> – m.p.: 84–86 °C. – <sup>1</sup>H NMR (500 MHz): 4.19 (3 H, s), 7.55 (1 H, dd,  $J = 4.5, 9$  Hz), 7.67 (1 H, s), 8.54 (1 H, dd,  $J = 1, 9$  Hz), 9.02 (1 H, dd,  $J = 1.5, 4.5$  Hz) ppm. – <sup>13</sup>C NMR (125 MHz): 62.2, 121.9, 126.0, 126.1, 126.4, 127.6, 133.1, 143.4, 150.8, 151.4 ppm. – IR: 1112, 1190, 1246, 1353, 1385, 1402, 1488, 2848, 2942, 3068  $\text{cm}^{-1}$ .

### 5-Chloro-8-methoxyquinoline<sup>8</sup> (S9)

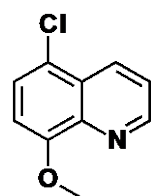

**S9** was prepared according to a literature procedure.<sup>7</sup> – <sup>1</sup>H NMR (500 MHz): 4.05 (3 H, s), 6.90 (1 H, d,  $J = 8.5$  Hz), 7.46 (1 H, d,  $J = 8.5$  Hz), 7.50 (1 H, dd,  $J = 4, 8.5$  Hz), 8.46 (1 H, dd,  $J = 1, 8.5$  Hz), 8.95 (1 H, dd,  $J = 1, 4$

Hz) ppm. –  $^{13}\text{C}$  NMR (125 MHz): 55.6, 106.9, 121.5, 125.9, 126.3, 127.9, 132.2, 140.0, 149.1, 154.1 ppm. – IR: 1100, 1159, 1252, 1269, 1307, 1385, 1440, 1502, 2841, 2956, 3035  $\text{cm}^{-1}$ .

### 7-Chloro-4-phenylquinoline 1-oxide (S10)

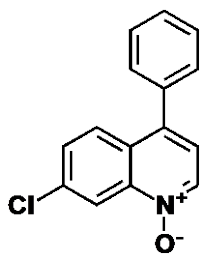

To a stirred solution of **S7** (400 mg, 1.67 mmol) in dichloromethane (5 mL) was added *meta*-chloroperoxybenzoic acid (748 mg, 2.17 mmol, 1.3 equiv., 50 % solution in  $\text{H}_2\text{O}$ ) at 0 °C. After 12 h the reaction was diluted with a saturated aqueous solution of sodium thiosulfate/sodium carbonate (30 mL, 1 : 1), and the aqueous layer extracted with dichloromethane (4 x 10 mL). The combined organic layers were dried over anhydrous sodium sulfate, concentrated under reduced pressure, and purified by column chromatography to yield **S10** (472 mg, 85 %) as tan solid. – m.p.: 112 – 114 °C. –  $^1\text{H}$  NMR (500 MHz): 7.23 (1 H, d,  $J = 6$  Hz), 7.45 – 7.55 (6 H, m), 7.88 (1 H, d,  $J = 9$  Hz), 8.55 (1 H, d,  $J = 6$  Hz), 8.85 (1 H, d,  $J = 2$  Hz) ppm. –  $^{13}\text{C}$  NMR (125 MHz): 119.4, 121.5, 127.1, 128.2, 128.3, 128.8, 128.9, 129.4, 129.6, 135.6, 136.3, 136.8, 138.4, 141.6 ppm. – IR: 1001, 1083, 1152, 1208, 1301, 1373, 1442, 1551, 2992, 3032, 3103  $\text{cm}^{-1}$ . – MS (ESI): 255.9, HRMS: 256.0550, calcd: 256.0524 [ $\text{M}+\text{H}^+$ ].

### 5-Chloro-8-methoxyquinoline 1-oxide (S11)

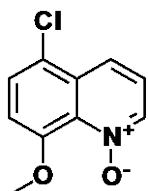

To a stirred solution of **S9** (500 mg, 2.59 mmol) in dichloromethane (5 mL) was added *meta*-chloroperoxybenzoic acid (1.16 g, 3.36 mmol, 1.3 equiv.,

50 % solution in H<sub>2</sub>O) at 0 °C. After 12 h the reaction was diluted with a saturated aqueous solution of sodium thiosulfate/sodium carbonate (30 mL, 1:1), and the aqueous layer extracted with dichloromethane (4 x 10 mL). The combined organic layers were dried over anhydrous sodium sulfate, concentrated under reduced pressure, and purified by column chromatography to yield **S11** (501 mg, 92 %) as brown oil. – <sup>1</sup>H NMR (300 MHz): 3.98 (3 H, s), 6.95 (1 H, d, *J* = 5 Hz), 7.27–7.32 (1 H, m), 7.52 (1 H, d, *J* = 5 Hz), 8.00 (1 H, d, *J* = 9.5 Hz), 8.42 (1 H, d, *J* = 7 Hz) ppm. – <sup>13</sup>C NMR (125 MHz): 57.1, 110.5, 122.0, 122.2, 122.9, 128.7, 130.9, 134.8, 138.5, 152.8 ppm. – IR: 1092, 1160, 1264, 1342, 1397, 1464, 2838, 2887, 3015 cm<sup>-1</sup>. – MS (ESI): 210.0, HRMS: 210.0376, calcd: 210.0316 [M+H<sup>+</sup>].

### Phenanthridine 5-oxide<sup>2</sup> (S12)

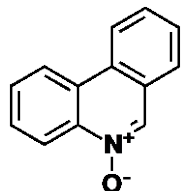

According to GP1, phenanthridine (50 mg, 0.279 mmol) was reacted with hydrogen peroxide (83 μL, 0.837 mmol, 3 equiv., 30% in H<sub>2</sub>O) and phosphomolybdic acid (25 μL, 0.005 mmol, 2 mol%, 20% in EtOH) in acetonitrile (200 μL). The isolated product afforded **S12** (41 mg, 76%) as brown oil. – <sup>1</sup>H NMR (500 MHz): 7.25–8.09 (5 H, m), 8.53–8.63 (2 H, m), 8.97 (1 H, d, *J* = 2 Hz), 9.19 (1 H, d, *J* = 2 Hz) ppm. – <sup>13</sup>C NMR (125 MHz): 120.67, 122.13, 122.77, 127.06, 128.18, 128.99, 129.53, 129.71, 129.91, 130.15, 130.46, 133.83, 169.27 ppm. – IR: 1071, 1191, 1473, 1559, 1647, 3071 cm<sup>-1</sup>.

### 7-Chloro-4-methoxyquinoline<sup>9</sup> (S13)

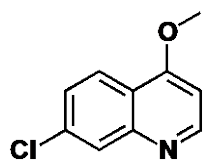

To a stirred solution of 4,7-dichloroquinoline (5 g, 25.51 mmol) in methanol (50 mL) was added sodium methoxide (6.88 g, 127.55 mmol, 5 equiv.). The reaction was heated at 95 °C for 12 h, then concentrated under reduced pressure, diluted with EtOAc (30 mL) and washed with H<sub>2</sub>O (2 x 20 mL). The organic layer was dried over anhydrous sodium sulfate and concentrated under reduced pressure to yield **S13** (4.78 g, 97 %) as colorless solid. – m.p.: 145–148 °C<sup>10</sup> – <sup>1</sup>H NMR (300 MHz): 3.19 (3 H, s), 6.58 (1 H, d, *J* = 5.5 Hz), 7.32 (1 H, dd, *J* = 2, 9 Hz), 7.92 (1 H, d, *J* = 2 Hz), 7.98 (1 H, d, *J* = 9 Hz), 8.62 (1 H, d, *J* = 5 Hz) ppm. – <sup>13</sup>C NMR (75 MHz): 55.71, 100.26, 119.66, 123.36, 126.34, 127.64, 135.54, 149.45, 152.42, 162.16 ppm. – IR: 982, 1070, 1209, 1360, 1425, 1503, 1616, 2984, 3050 cm<sup>-1</sup>.

#### 7-Chloro-4-methoxyquinoline 1-oxide<sup>11</sup> (**S14**)

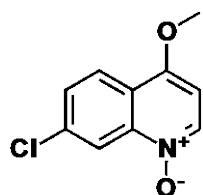

To a stirred solution of **S13** (1.6 g, 5.54 mmol) in acetonitrile (2.5 mL) were added hydrogen peroxide (1.7 mL, 16.62 mmol, 3 equiv., 30% in H<sub>2</sub>O) and phosphomolybdic acid (1 mL, 0.118 mmol, 2 mol%, 20% in EtOH) then heated to 50 °C. After 12 h the reaction was diluted with a saturated aqueous solution of ammonium chloride (10 mL), and the aqueous layer extracted with dichloromethane (4 x 15 mL). The organic layers were combined, dried over anhydrous sodium sulfate, concentrated under reduced pressure, and purified by column chromatography to yield **S14** (1.12 g, 97%) as colorless solid. – m.p.: 145–147 °C – <sup>1</sup>H NMR (500 MHz): 4.06 (3 H, s), 6.64 (1 H, d, *J* = 7 Hz), 7.59 (1 H, d, *J* = 2 Hz), 8.15 (1 H, d, *J* = 9 Hz), 8.46 (1 H, d, *J* = 7 Hz), 8.77 (1 H, d, *J* = 2 Hz) ppm. – <sup>13</sup>C NMR (125 MHz):



56.34, 99.84, 119.57, 120.99, 123.39, 124.28, 129.06, 136.99, 137.88, 154.26 ppm. –  
IR: 1110, 1243, 1325, 1445, 2988, 3025 cm<sup>-1</sup>.

### Quinoline 1-oxide<sup>2</sup> (**2**)

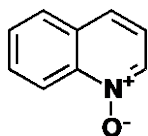

According to GP1, quinoline (5 g, 40.65 mmol) was reacted with hydrogen peroxide (6.1 mL, 60.97 mmol, 1.5 equiv., 30% in H<sub>2</sub>O) and phosphomolybdic acid (3.7 mL, 0.406 mmol, 1 mol%, 20% in EtOH) in acetonitrile (20 mL). The crude product was purified by column chromatography to afford **2** (4.95 g, 88%) as brown solid. – m.p.: 60–62 °C<sup>12</sup> – <sup>1</sup>H NMR (300 MHz): 7.29 (1 H, dd, *J* = 6, 8 Hz), 7.64 (1 H, dt, *J* = 1, 7 Hz), 7.72–7.79 (2 H, m), 7.86 (1 H, dd, *J* = 1.5, 8 Hz), 8.52 (1 H, dd, *J* = 1, 6 Hz) ppm. – <sup>13</sup>C NMR: 119.81, 120.96, 125.87, 128.12, 128.76, 130.41, 130.50, 135.60 ppm. – IR: 1157, 1311, 1452, 1554, 2931, 2995, 3025 cm<sup>-1</sup>.

## Crystal Structure of 4-(*tert*-Butylthio)-7-chloroquinoline 1-oxide (S2)

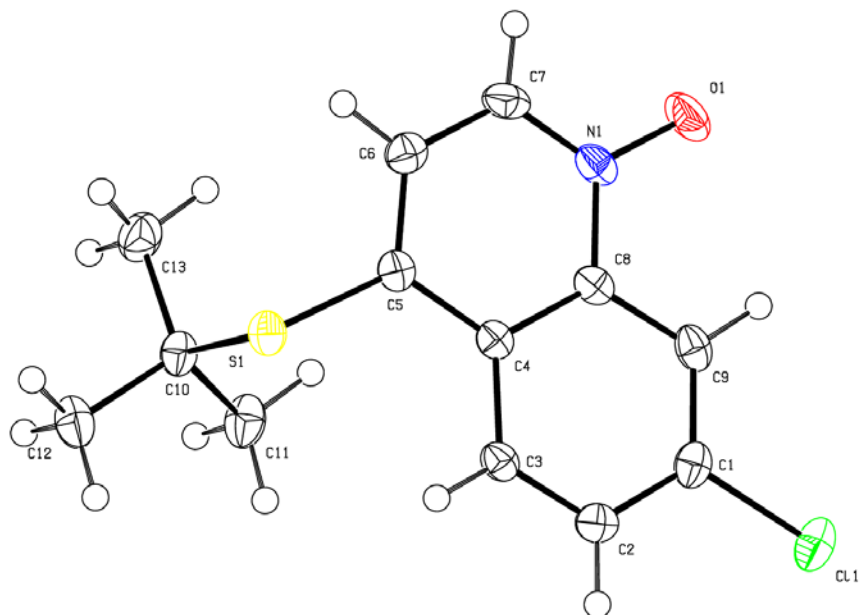

Bond precision: C-C = 0.0023 Å

Wavelength=0.71073

Cell: a=9.1435(17)

b=6.0132(11)

c=23.209(5)

alpha=90

beta=90.530(3)

gamma=90

Temperature: 98 K

|                | Calculated                            | Reported                              |
|----------------|---------------------------------------|---------------------------------------|
| Volume         | 1276.0(4)                             | 1276.0(4)                             |
| Space group    | P 21/c                                | P2(1)/c                               |
| Hall group     | -P 2ybc                               | -P 2ybc                               |
| Moiety formula | C <sub>13</sub> H <sub>14</sub> CINOS | C <sub>13</sub> H <sub>14</sub> CINOS |
| Sum formula    | C <sub>13</sub> H <sub>14</sub> CINOS | C <sub>13</sub> H <sub>14</sub> CINOS |

|                                     |              |              |
|-------------------------------------|--------------|--------------|
| Mr                                  | 267.77       | 267.76       |
| Dx, g/cm <sup>3</sup>               | 1.394        | 1.394        |
| Z                                   | 4            | 4            |
| Mu (mm <sup>-1</sup> )              | 0.445        | 0.445        |
| F000                                | 560.0        | 560.0        |
| F000'                               | 561.26       |              |
| h,k,l <sub>max</sub>                | 11,7,28      | 11,7,28      |
| N <sub>ref</sub>                    | 2521         | 2513         |
| T <sub>min</sub> , T <sub>max</sub> | 0.899, 0.956 | 0.719, 1.000 |
| T <sub>min</sub> '                  | 0.837        |              |

Correction method = MULTI-SCAN

Data completeness= 0.997

Theta(max)= 26.000

R(reflections)= 0.0372( 2348)

wR2(reflections)= 0.1019( 2513)

S = 1.003

Npar= Npar = 196

## References

- [1] E. A. Shmoilova, O. V. Dyablo, A. F. Pozharskii, *Chem. Heterocycl. Compd.*, 2013, **49**, 1308–1322.
- [2] O. V. Larionov, D. Stephens, A. M. Mfuh, A. D. Arman, A. S. Naumova, G. Chavez, B. Skenderi, *Org. Biomol. Chem.* 2014, **12**, 3026.
- [3] *Br. Pat.* GB19610002951, 1964.
- [4] G. Malecki, J. E. Nycz, E. Ryrych, L. Ponikiewski, M. Nowak, J. Kusz, J. Pikies, *J. Mol. Struct.*, 2010, **969**, 130–138.
- [5] R. W. Friesen, L. A. Trimble, *Can. J. Chem.*, 2004, **82**, 206–214.
- [6] H. Gershon, M. W. McNeil, S. G. Schulman, *J. Org. Chem.*, 1972, **37**, 4078–4082.
- [7] *World Pat.*, WO2005030760A1, 2005.
- [8] C. W. Cheung, D. S. Surry, S. L. Buchwald, *Org. Lett.*, 2013, **15**, 3734–3737.
- [9] P. Bharathi, D. L. Comins, *Org. Lett.*, 2007, **10**, 221–223.
- [10] R. E. Lutz, J. F. Codington, R. J. Rowlett, A. J. Deinet, P. S. Bailey, *J. Am. Chem. Soc.*, 1946, **68**, 1810–1812.
- [11] O. V. Larionov, D. Stephens, A. Mfuh, G. Chavez, *Org. Lett.*, 2014, **16**, 864–867.
- [12] K. S. Sharma, S. Kumari, R. P. Singh, *Synthesis*, 1981, 316–318.
- [13] M. Oishi, H. Kondo, H. Amii, *Chem. Comm.*, 2009, 1909–1911.
- [14] Y. Cheng, H. Jiang, Y. Zhang, S. Yu, *Org. Lett.*, 2013, **15**, 5520–5523.
- [15] L. C. March, W. A. Romanchick, G. S. Bajwa, M. M. Joullie, *J. Med. Chem.*, 1973, **16**, 337–342.
- [16] H. Keller, M. Schlosser, *Tetrahedron*, 1996, **52**, 4637–4644.
- [17] M. Chen, S. L. Buchwald, *Angew. Chem. Int. Ed.*, 2013, **52**, 11628–11631.
- [18] Y. Dan-oh, H. Matta, J. Uemura, H. Watanabe, K. Uneyama, *Bull. Chem. Soc. Jpn.*, 1995, **68**, 1497–1507.
- [19] P. Li, L.-J. Liu, J.-T. Liu, *Org. Biomol. Chem.*, 2011, **9**, 74–77.
- [20] H. Uno, S.-I. Okada, H. Suzuki, *J. Heterocycl. Chem.*, 1991, **28**, 341–346.
- [21] G. Li, C. Jia, K. Sun, *Org. Lett.*, 2013, **15**, 5198–5201.

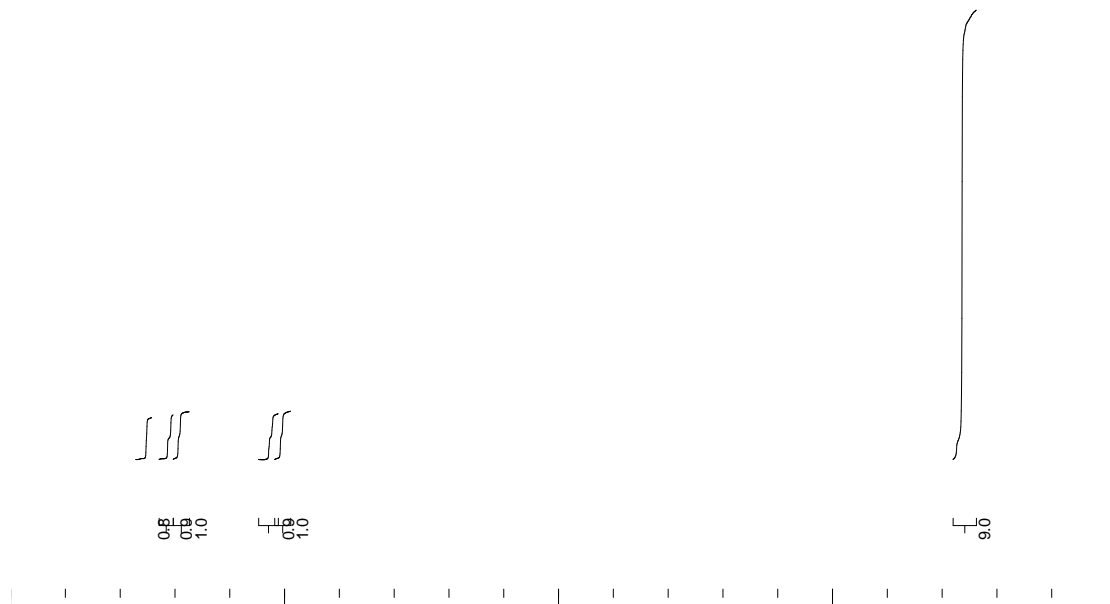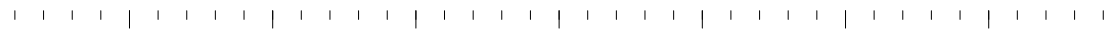

$\int$   $\int$   $\int$   $\int$   $\int$   
 $\int$   $\int$

$\int$   $\int$   $\int$   $\int$   $\int$   
 $\int$   $\int$

$\int$

$\int$

$\int$

$\int$

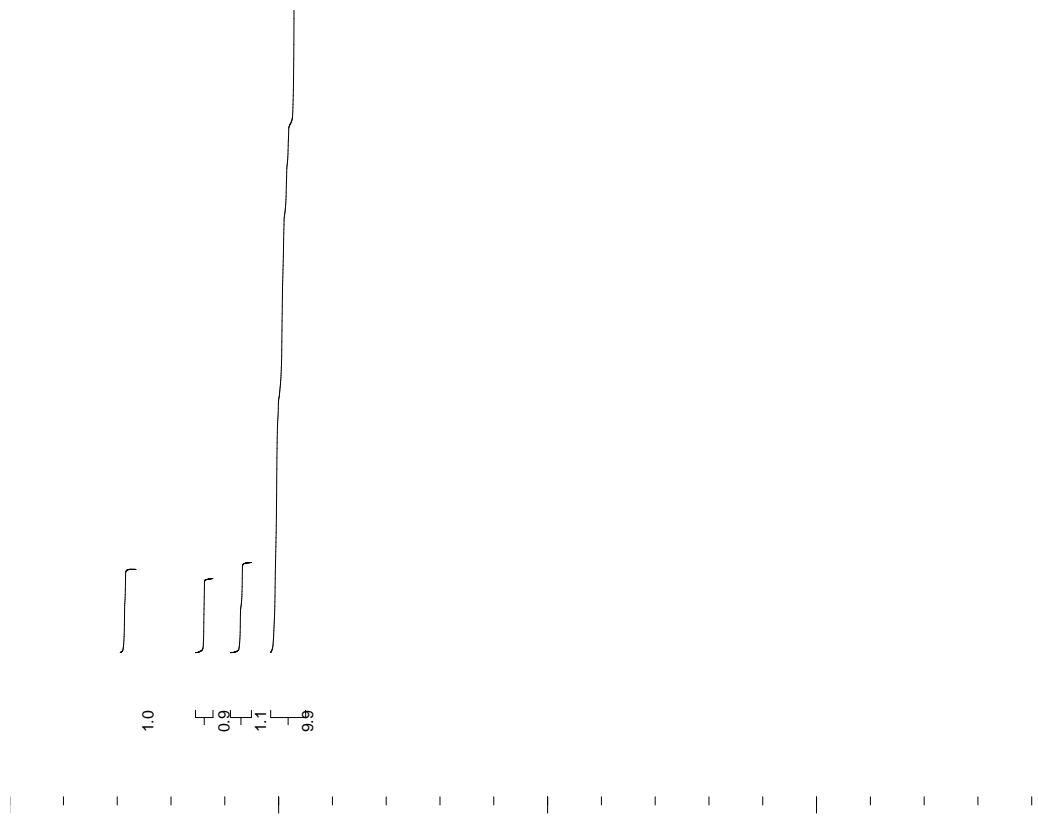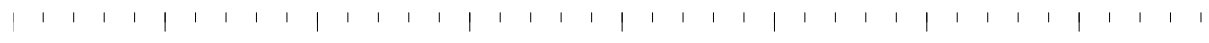

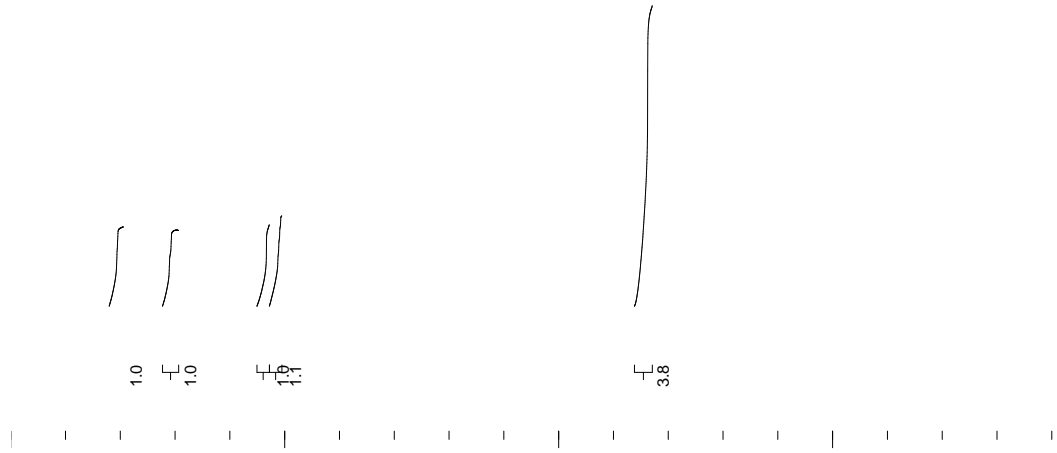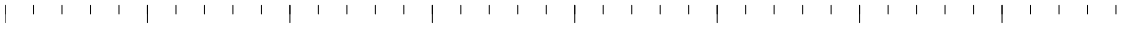



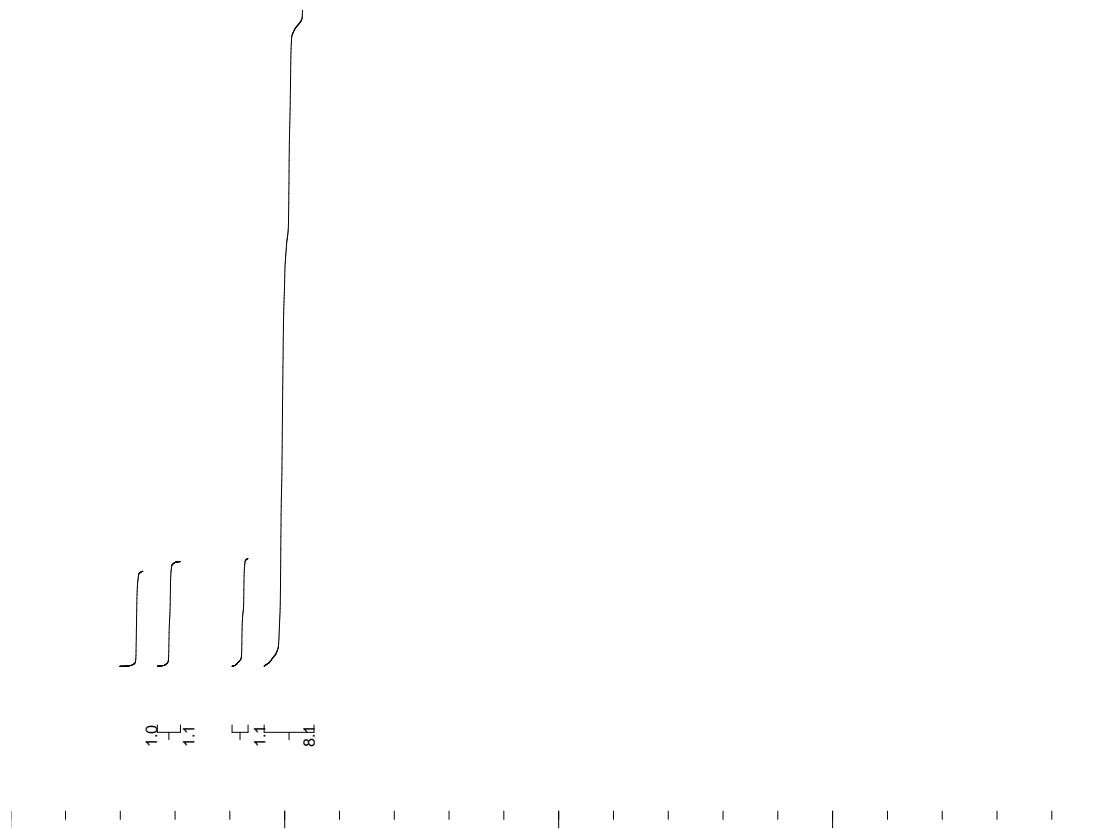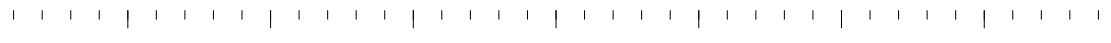

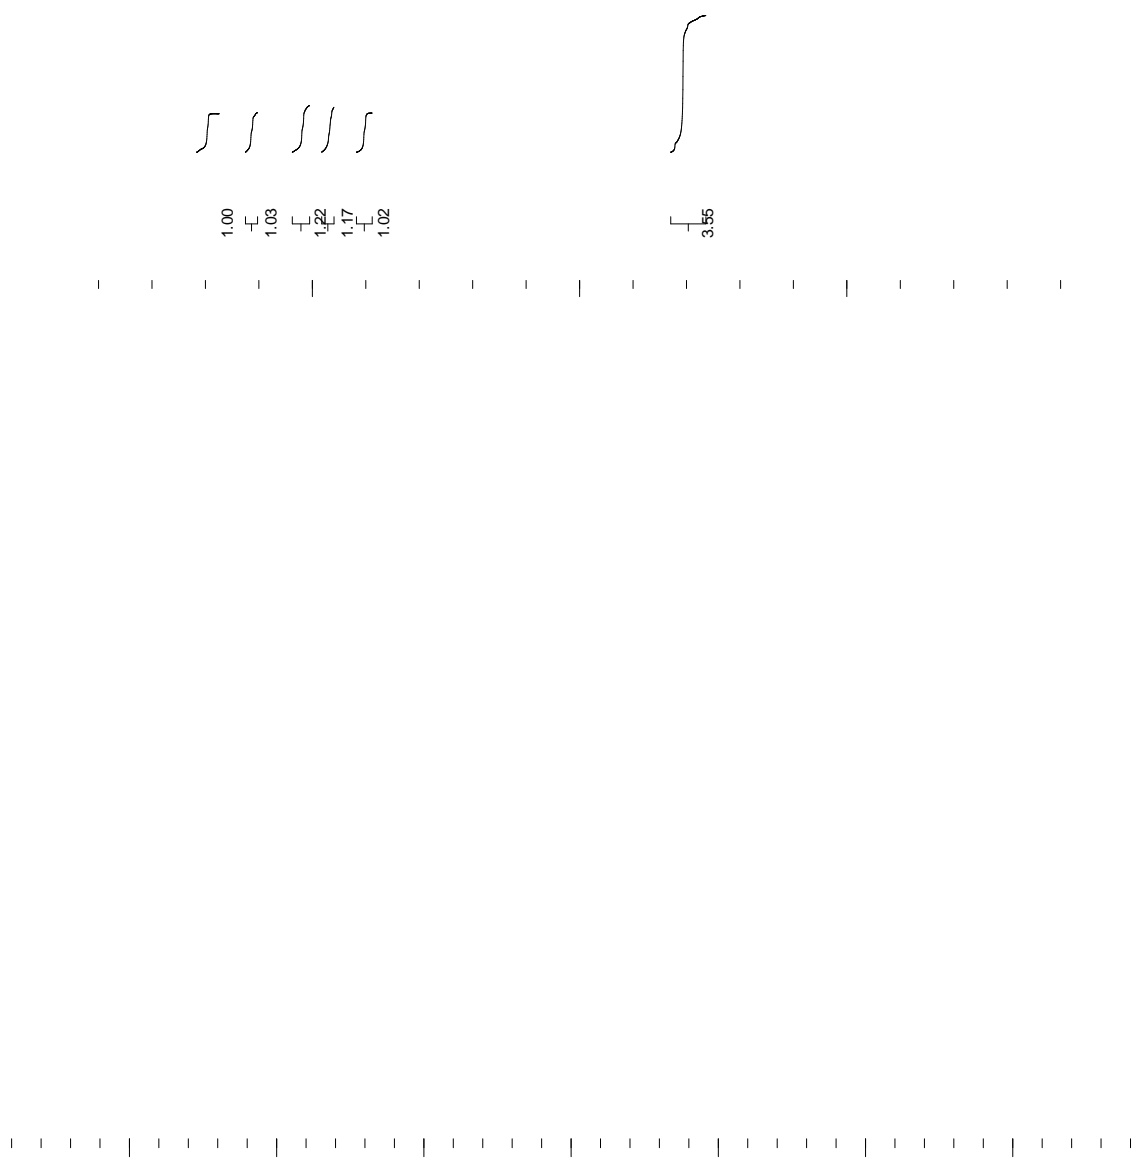

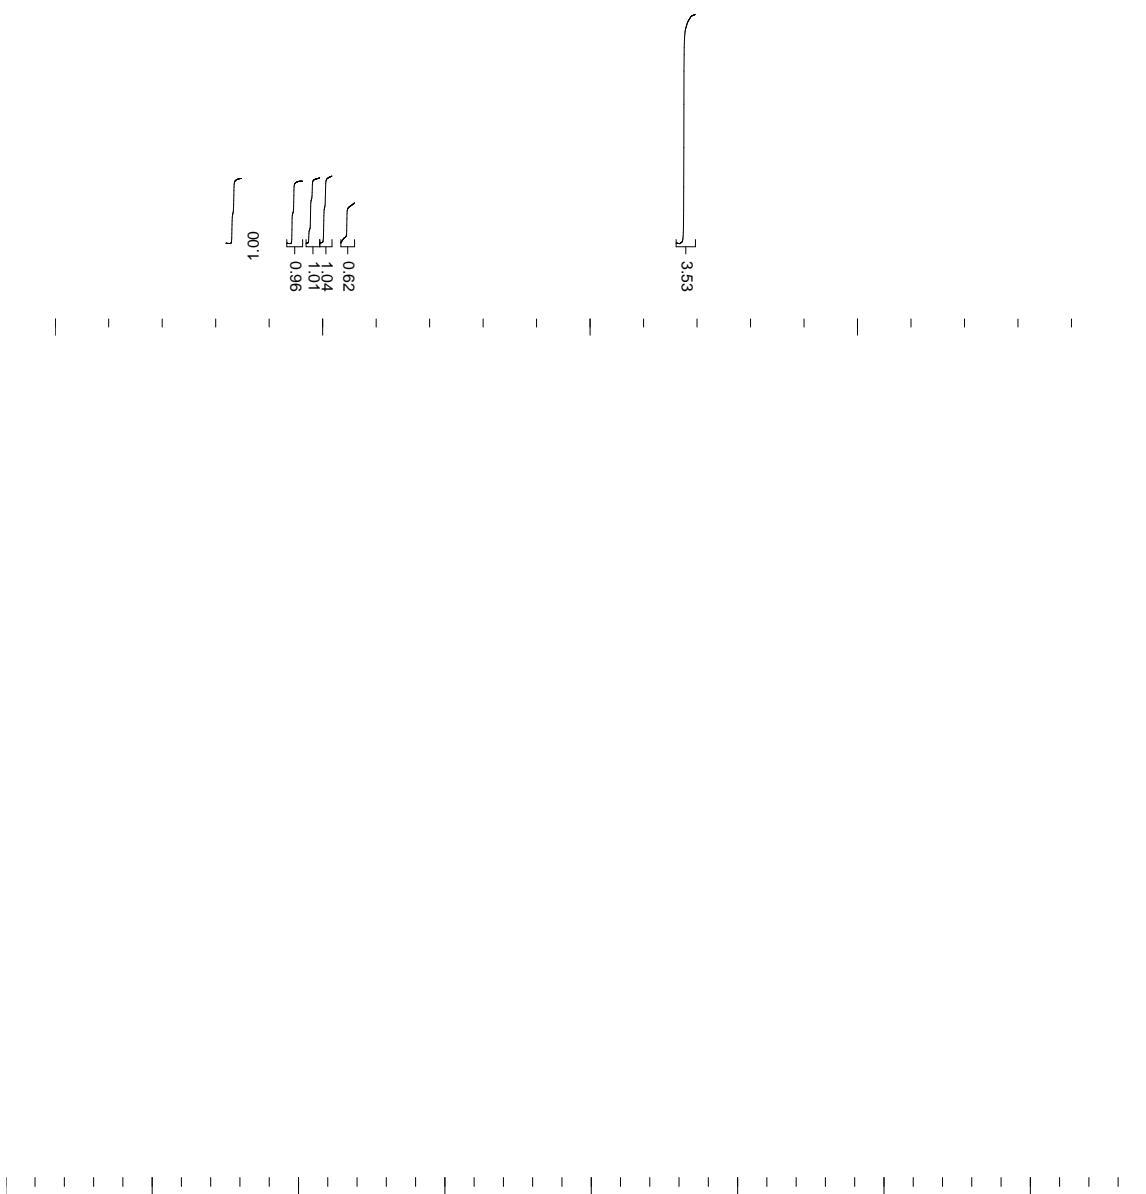

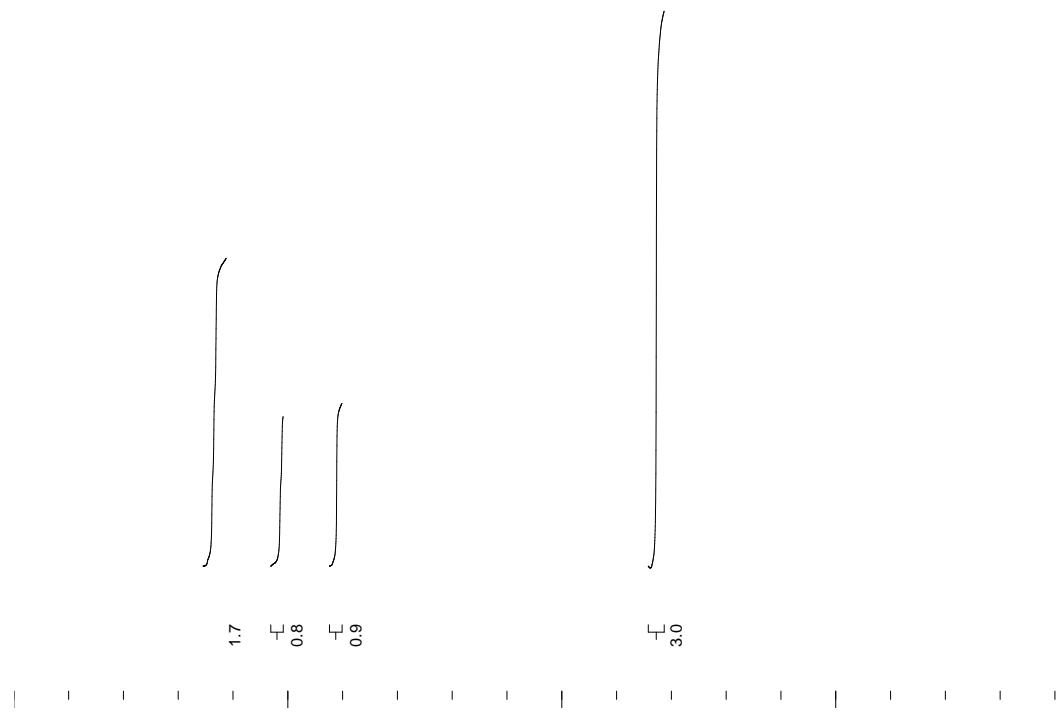

∫ ∫ ∫ ∫

1.0 4.0 8.0 12.0

| | | | | | | | | | | | | | | | | | | | | |

| | | | | | | | | | | | | | | | | | | | | |

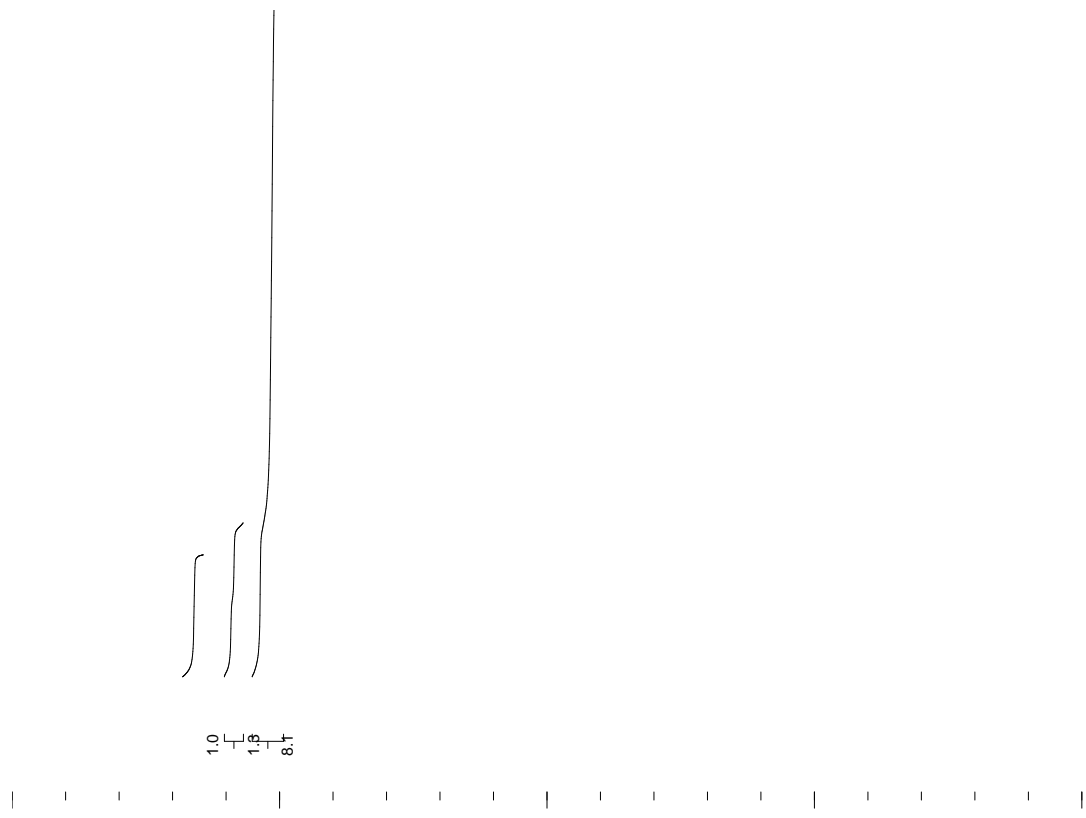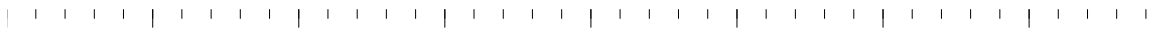

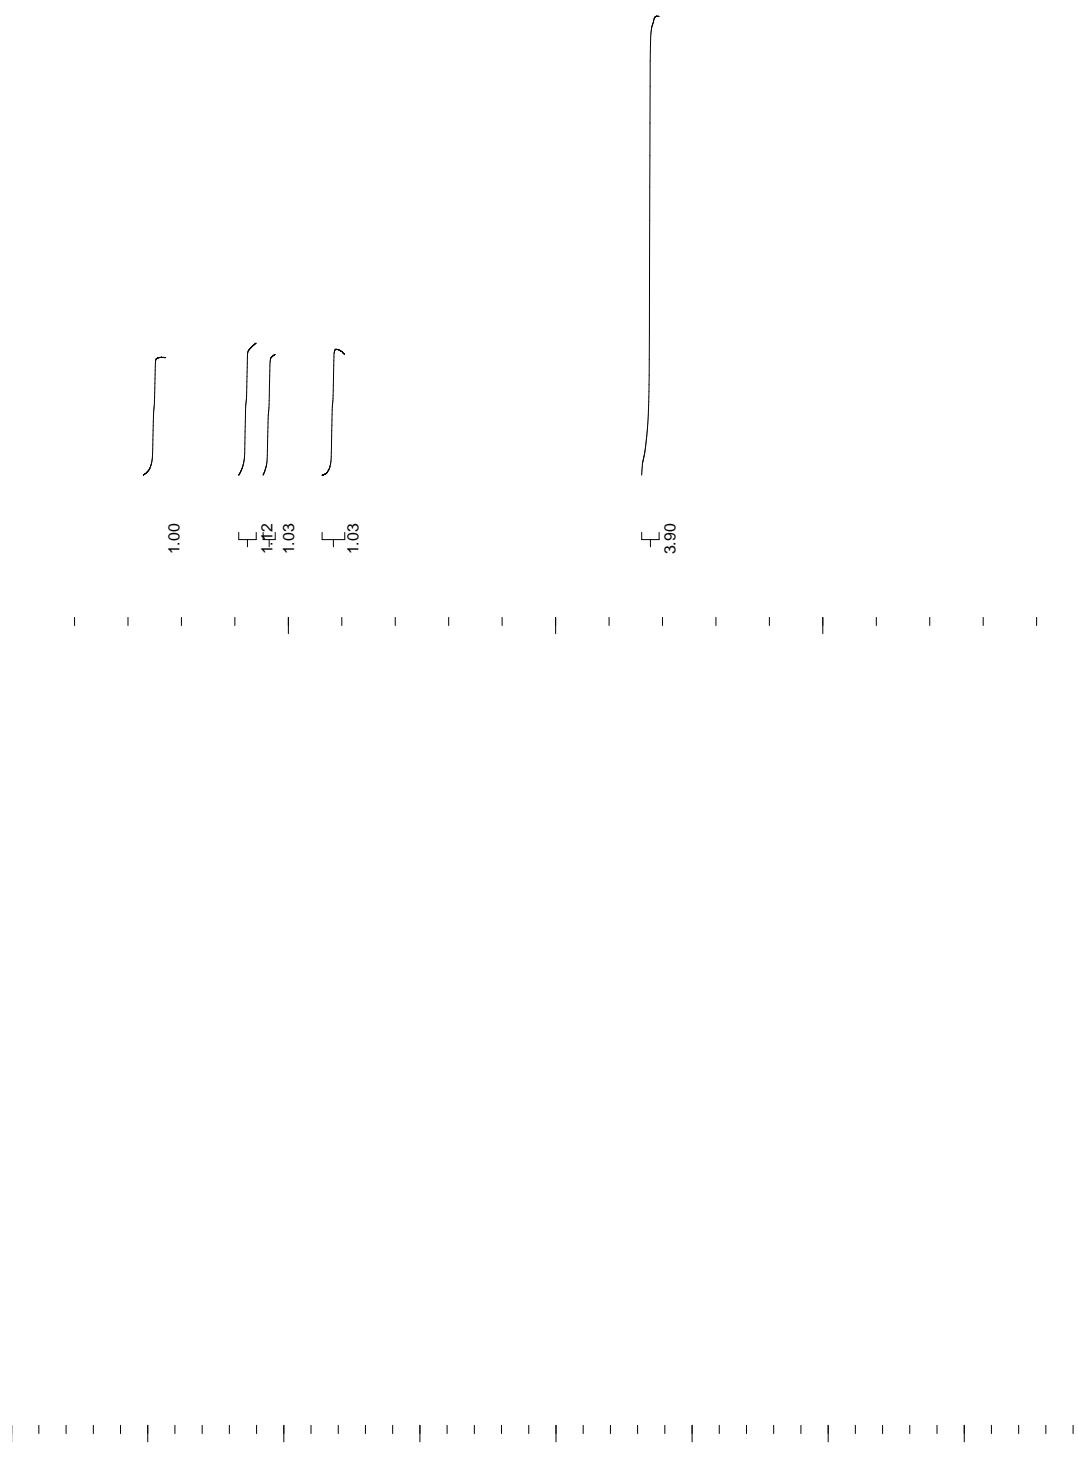

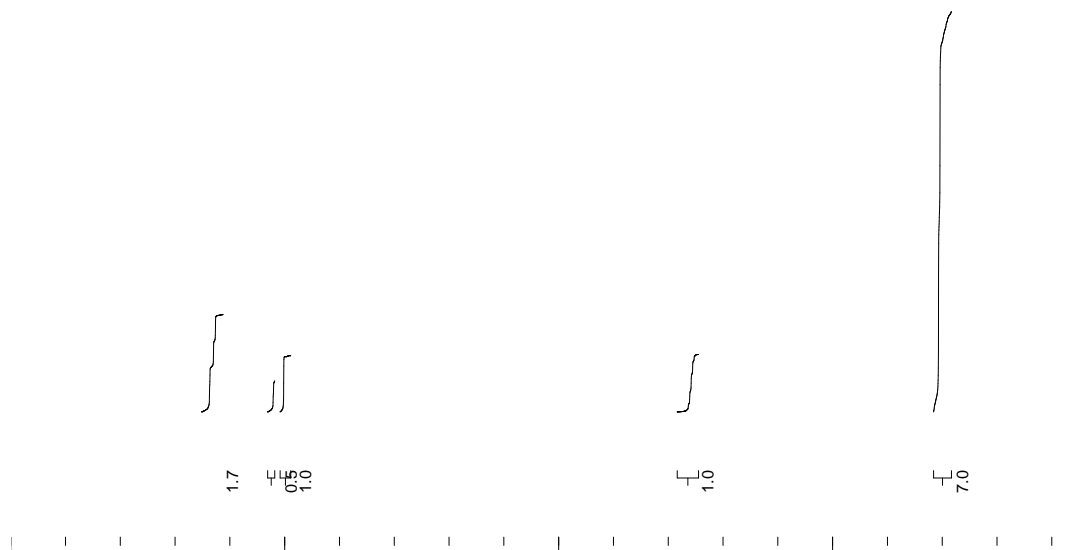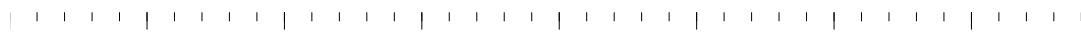



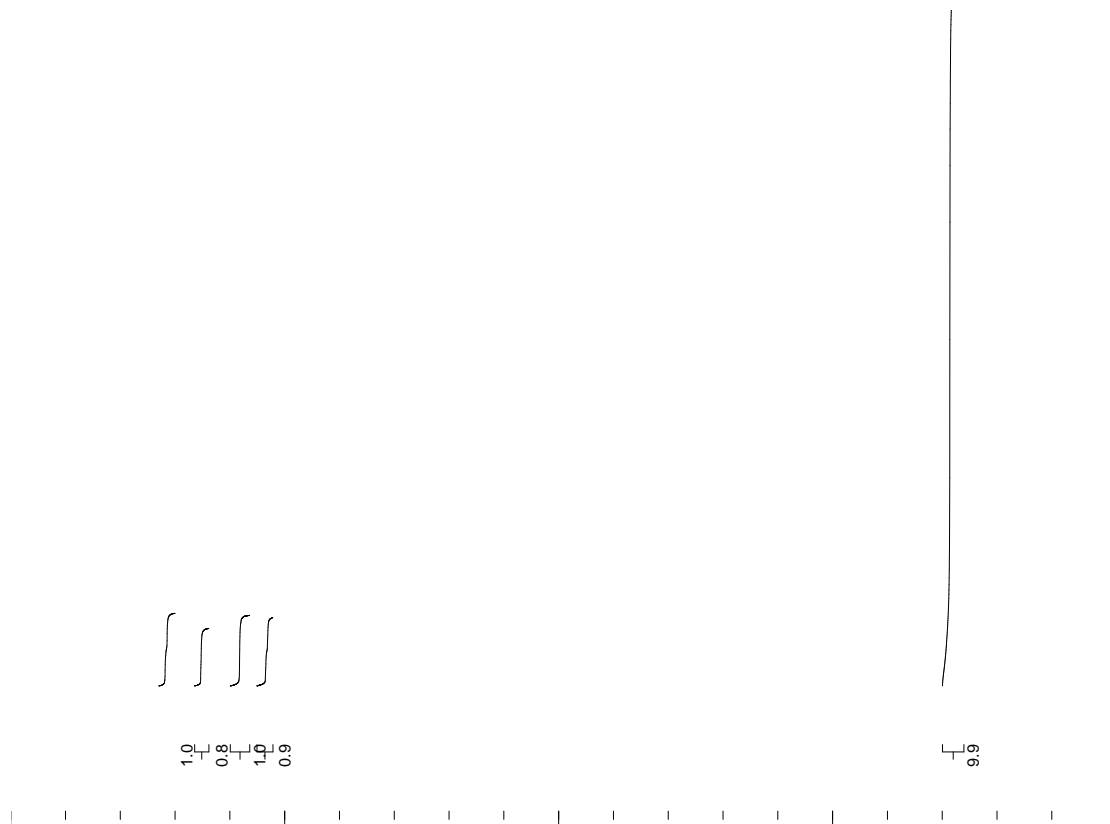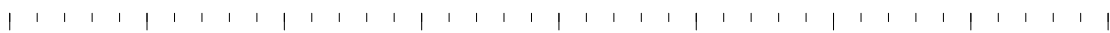

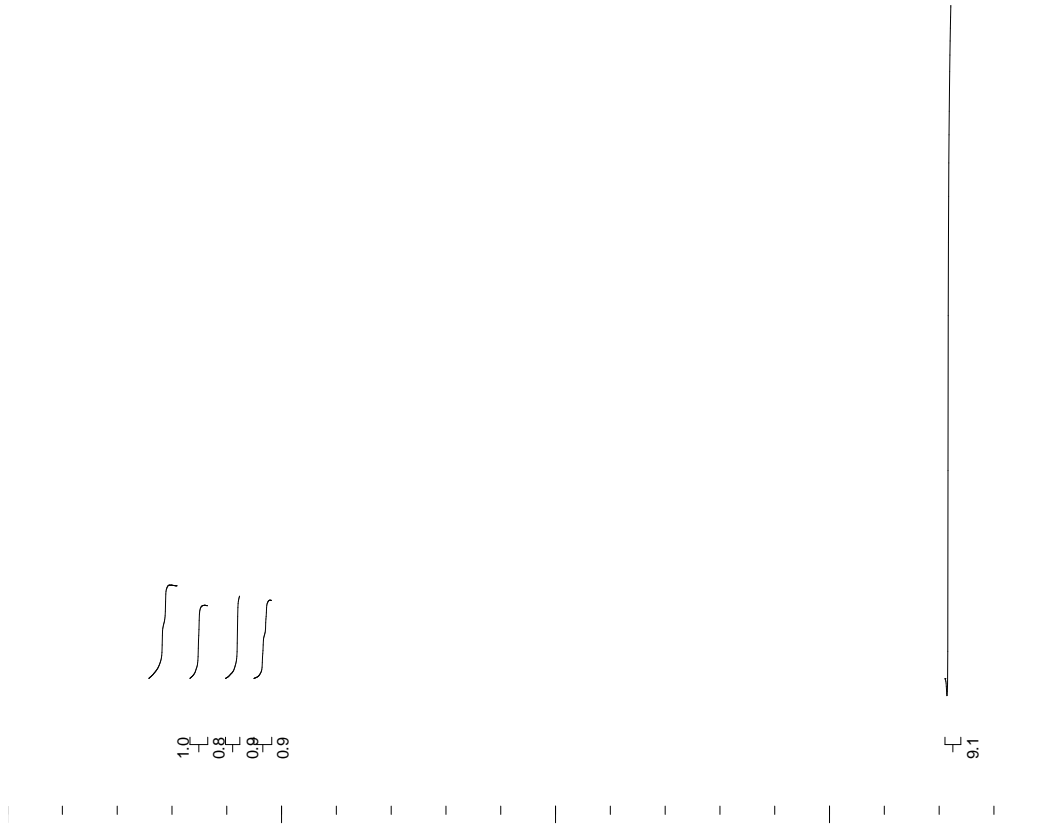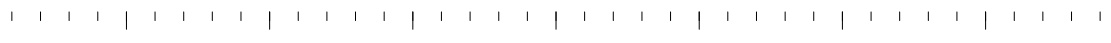

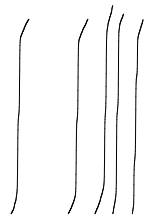

10 10 10 10 10

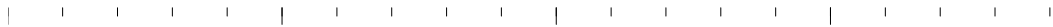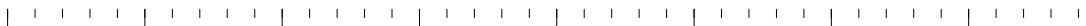

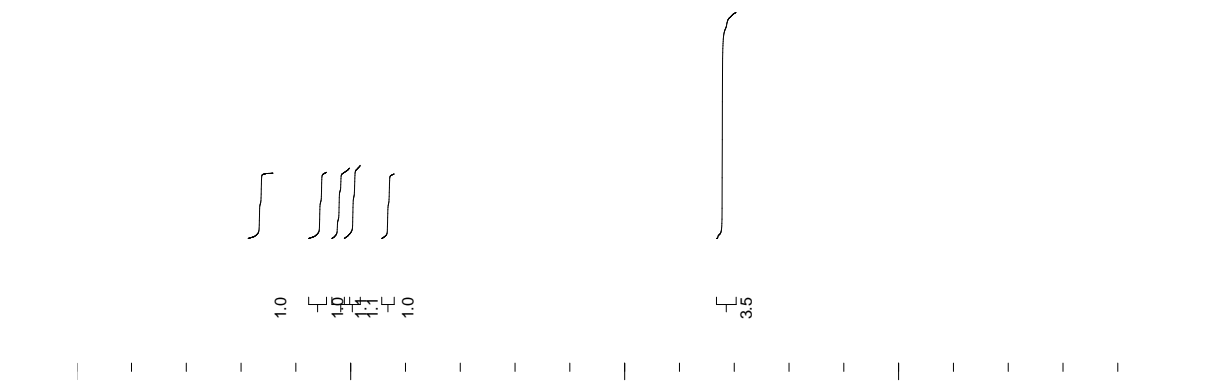

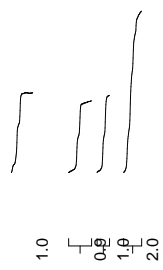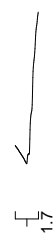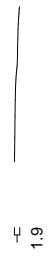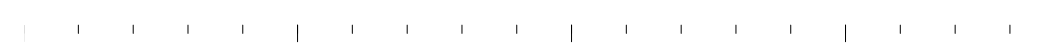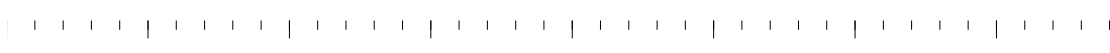

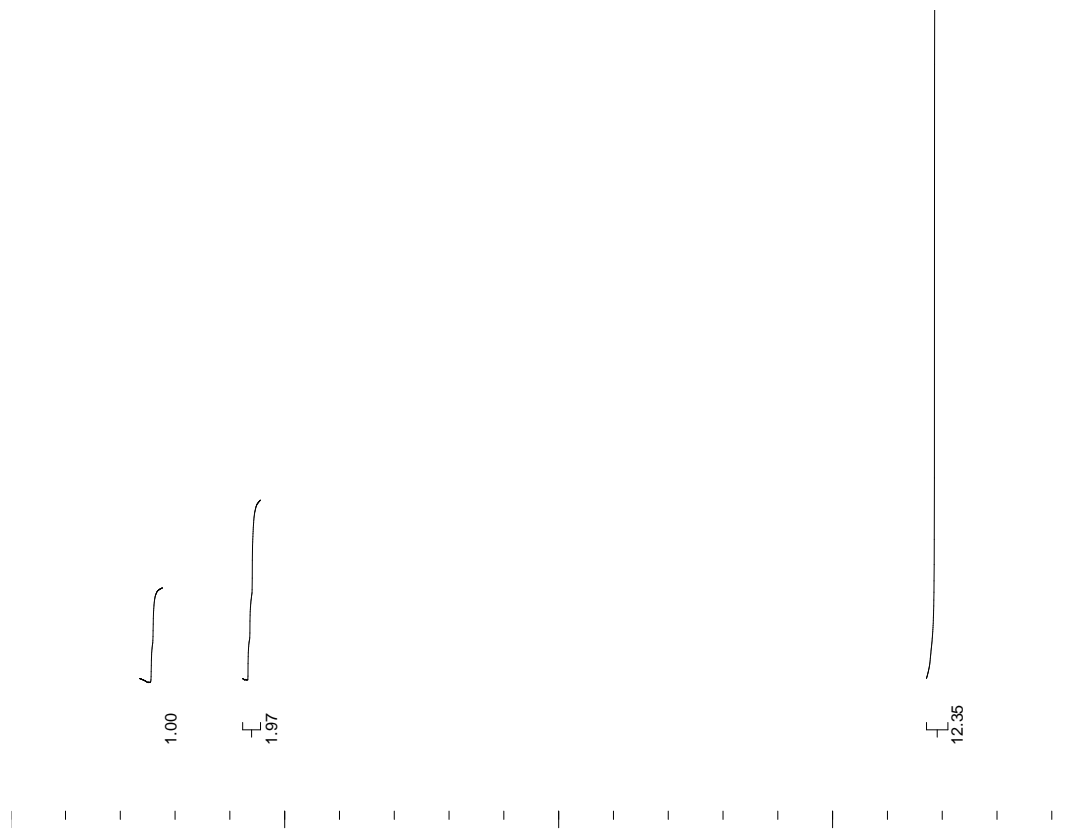

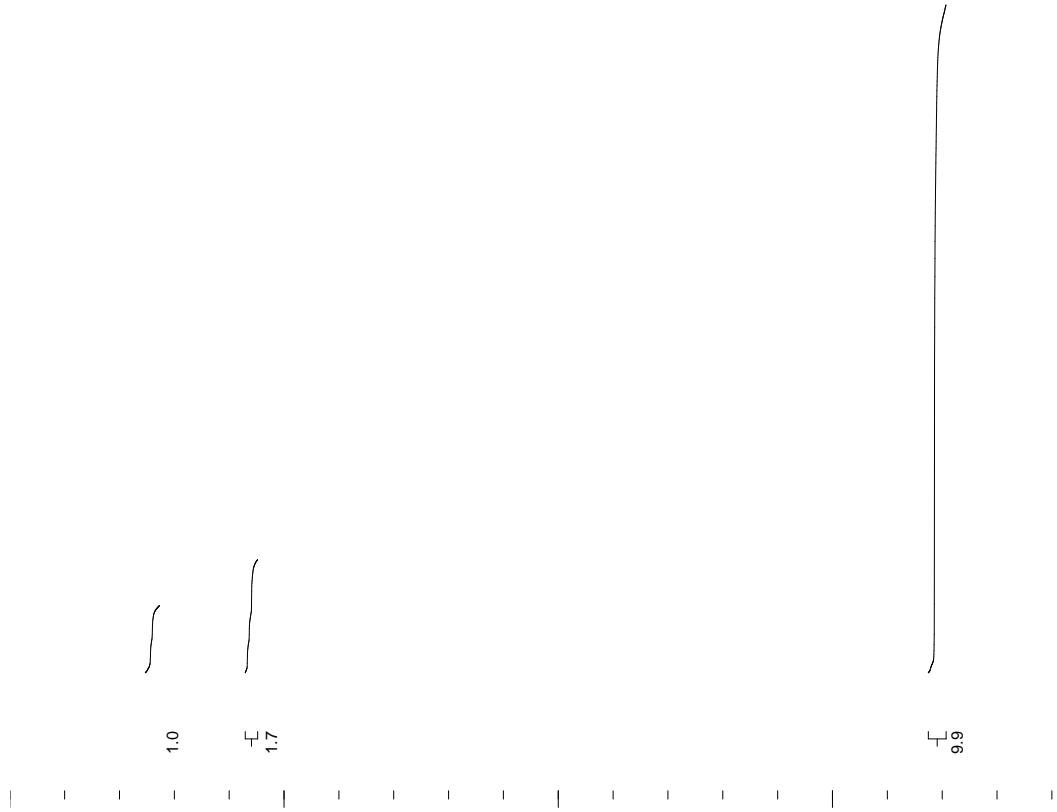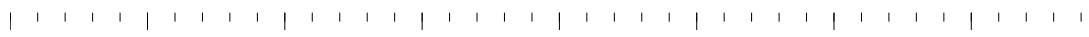

Supplement: NIHMS611330-supplement-Supplementary_Information.pdf [file NIHMS611330-supplement-Supplementary_Information.pdf]
