# Supplementary material
Source: PubMed Central journal article supplement (PMC4134925)
Supplement: NIHMS611330-supplement-Graphical_Abstract.pdf [file NIHMS611330-supplement-Graphical_Abstract.pdf]

## Graphical Abstract

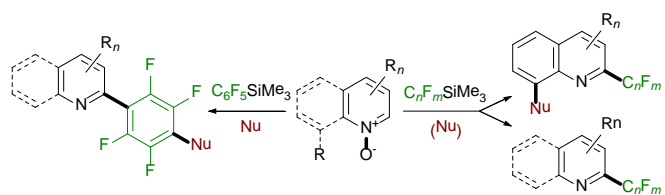

## Sentence highlighting the novelty of the work

Novel and efficient method of direct perfluoroalkylation of azine N-oxides has been developed and interesting mechanistic details have been provided.
